# Supplementary material for: Solution structure of a europium–nicotianamine complex supports that phytosiderophores bind lanthanides
Source: Royal Society of Chemistry journal article supplement (doi:10.1039/d0cp06150f), 2021-01-01
Supplement: d0cp06150f1.pdf [file d0cp06150f1.pdf]

Supplementary Information

**Solution structure of a europium-nicotianamine complex supports that  
phytosiderophores bind lanthanides**

Danil S. Kaliakin<sup>1</sup>, Josiane A. Sobrinho<sup>2</sup>, Jorge H.S.K. Monteiro<sup>2</sup>, Ana de Bettencourt-Dias<sup>2</sup>,

David C. Cantu<sup>1</sup>

*<sup>1</sup>Department of Chemical and Materials Engineering, <sup>2</sup>Department of Chemistry, University of  
Nevada, Reno, NV 89557*

**Atomic cartesian coordinates (Å) of the PBE/LnPP1 GTH optimized structure of the [Eu<sup>3+</sup>-EDTA<sup>4-</sup>·(H<sub>2</sub>O)<sub>3</sub>]<sup>-</sup> complex. Only the water molecules coordinated to Eu<sup>3+</sup> included.**

| element | mass | x           | y           | z           |
|---------|------|-------------|-------------|-------------|
| Eu      | 63.0 | 13.84599972 | 11.27400017 | 9.83600044  |
| N       | 7.0  | 11.16800022 | 10.50300026 | 9.22299957  |
| N       | 7.0  | 13.53100014 | 9.68099976  | 7.58300018  |
| C       | 6.0  | 11.07499981 | 10.15999985 | 7.78700018  |
| C       | 6.0  | 12.14700031 | 9.15999985  | 7.38800001  |
| C       | 6.0  | 10.44499969 | 11.73600006 | 9.57999992  |
| C       | 6.0  | 10.83300018 | 12.16499996 | 10.99300003 |
| C       | 6.0  | 13.91300011 | 10.60400009 | 6.48999977  |
| C       | 6.0  | 13.35499954 | 12.02099991 | 6.63800001  |
| C       | 6.0  | 14.49300003 | 8.56000042  | 7.63700008  |
| C       | 6.0  | 15.76700020 | 8.92500019  | 8.39999962  |
| C       | 6.0  | 10.78299999 | 9.37399960  | 10.08899975 |
| C       | 6.0  | 11.93299961 | 8.58800030  | 10.71899986 |
| O       | 8.0  | 10.06599998 | 12.90699959 | 11.66499996 |
| O       | 8.0  | 11.96300030 | 11.73999977 | 11.43999958 |
| O       | 8.0  | 13.20100021 | 12.69099998 | 5.55399990  |
| O       | 8.0  | 13.11600018 | 12.46700001 | 7.80000019  |
| O       | 8.0  | 15.67899990 | 9.78100014  | 9.32999992  |
| O       | 8.0  | 16.84700012 | 8.31200027  | 8.09500027  |
| O       | 8.0  | 13.12100029 | 9.03899956  | 10.65100002 |
| O       | 8.0  | 11.59700012 | 7.50400019  | 11.29800034 |
| H       | 1.0  | 11.13399982 | 11.08199978 | 7.20599985  |
| H       | 1.0  | 10.08199978 | 9.73299980  | 7.56500006  |
| H       | 1.0  | 12.04899979 | 8.24800014  | 7.99100018  |
| H       | 1.0  | 11.97999954 | 8.86400032  | 6.33900023  |
| H       | 1.0  | 9.35200024  | 11.60000038 | 9.50800037  |
| H       | 1.0  | 10.73499966 | 12.53299999 | 8.87699986  |
| H       | 1.0  | 13.63099957 | 10.19699955 | 5.50400019  |
| H       | 1.0  | 15.01000023 | 10.71700001 | 6.49100018  |
| H       | 1.0  | 14.74199963 | 8.17199993  | 6.63800001  |
| H       | 1.0  | 14.03499985 | 7.73199987  | 8.19799995  |
| H       | 1.0  | 10.16899967 | 9.73400021  | 10.92599964 |
| H       | 1.0  | 10.14900017 | 8.66699982  | 9.53199959  |
| O       | 8.0  | 15.75000000 | 12.53199959 | 8.75599957  |
| H       | 1.0  | 15.65999985 | 13.45699978 | 8.39299965  |
| H       | 1.0  | 16.64100075 | 12.55799961 | 9.22900009  |
| O       | 8.0  | 15.31000042 | 11.30000019 | 11.81200027 |
| H       | 1.0  | 16.06100082 | 10.67199993 | 11.95400047 |
| H       | 1.0  | 15.11699963 | 11.76000023 | 12.67500019 |
| O       | 8.0  | 13.92599964 | 13.71700001 | 10.79699993 |
| H       | 1.0  | 14.83300018 | 13.95699978 | 11.17199993 |
| H       | 1.0  | 13.27200031 | 13.98400021 | 11.51299953 |

**Atomic cartesian coordinates (Å) of the PBE/LnPP1 GTH optimized structure of the [Eu<sup>3+</sup>-NA·(H<sub>2</sub>O)<sub>3</sub>]<sup>3+</sup> complex. Only the water molecules coordinated to Eu<sup>3+</sup> included.**

| element | mass | x           | y           | z           |
|---------|------|-------------|-------------|-------------|
| Eu      | 63.0 | 7.92100000  | 7.83099985  | 6.86999989  |
| C       | 6.0  | 11.68400002 | 10.07100010 | 6.63500023  |
| C       | 6.0  | 12.94900036 | 9.23299980  | 6.92299986  |
| C       | 6.0  | 12.95199966 | 9.77600002  | 8.36299992  |
| C       | 6.0  | 10.34599972 | 9.34799957  | 6.50099993  |
| O       | 8.0  | 10.32299995 | 8.13300037  | 6.12400007  |
| O       | 8.0  | 9.26700020  | 9.98299980  | 6.73899984  |
| N       | 7.0  | 11.95600033 | 10.85700035 | 7.95100021  |
| H       | 1.0  | 11.74699974 | 10.77799988 | 5.79600000  |
| H       | 1.0  | 12.82600021 | 8.15200043  | 6.84800005  |
| H       | 1.0  | 13.81999969 | 9.55700016  | 6.34499979  |
| H       | 1.0  | 13.87199974 | 10.20600033 | 8.76500034  |
| H       | 1.0  | 12.49400043 | 9.08399963  | 9.07499981  |
| C       | 6.0  | 10.89299965 | 11.42700005 | 8.87500000  |
| C       | 6.0  | 10.86200047 | 10.87899971 | 10.31499958 |
| C       | 6.0  | 9.78999996  | 9.82600021  | 10.68799973 |
| N       | 7.0  | 8.40999985  | 10.40299988 | 10.58600044 |
| C       | 6.0  | 7.35200024  | 9.54500008  | 11.22599983 |
| C       | 6.0  | 5.94099998  | 10.01700020 | 10.85400009 |
| C       | 6.0  | 5.14799976  | 9.05900002  | 9.93299961  |
| N       | 7.0  | 3.94400001  | 9.78999996  | 9.45499992  |
| H       | 1.0  | 11.12300014 | 12.49300003 | 8.92300034  |
| H       | 1.0  | 9.93400002  | 11.31799984 | 8.35799980  |
| H       | 1.0  | 10.70600033 | 11.74300003 | 10.97900009 |
| H       | 1.0  | 11.84200001 | 10.47900009 | 10.60799980 |
| H       | 1.0  | 9.93000031  | 9.59000015  | 11.75300026 |
| C       | 6.0  | 9.93900013  | 8.50100040  | 9.90900040  |
| O       | 8.0  | 9.09599972  | 8.22700024  | 9.00300026  |
| O       | 8.0  | 10.93599987 | 7.78900003  | 10.24100018 |
| H       | 1.0  | 8.14700031  | 10.67700005 | 9.61100006  |
| H       | 1.0  | 7.52699995  | 8.51000023  | 10.92800045 |
| H       | 1.0  | 7.52500010  | 9.60000038  | 12.30599976 |
| H       | 1.0  | 5.34100008  | 10.15900040 | 11.76200008 |
| H       | 1.0  | 5.98899984  | 11.00199986 | 10.37199974 |
| H       | 1.0  | 4.80000019  | 8.18500042  | 10.49899960 |
| H       | 1.0  | 3.28099990  | 9.19499969  | 8.88599968  |
| C       | 6.0  | 5.99599981  | 8.52400017  | 8.77700043  |
| O       | 8.0  | 6.46999979  | 7.34899998  | 8.83699989  |
| O       | 8.0  | 6.28399992  | 9.29199982  | 7.78399992  |
| H       | 1.0  | 8.35599995  | 11.32400036 | 11.14200020 |
| H       | 1.0  | 4.14499998  | 10.62199974 | 8.84500027  |
| H       | 1.0  | 12.54800034 | 11.66100025 | 7.61299992  |
| H       | 1.0  | 3.35700011  | 10.09000015 | 10.29199982 |
| O       | 8.0  | 6.53399992  | 6.38100004  | 5.93200016  |
| H       | 1.0  | 5.75299978  | 5.80200005  | 6.27400017  |
| H       | 1.0  | 6.79400015  | 5.90700006  | 5.03900003  |
| O       | 8.0  | 8.91699982  | 5.61100006  | 7.26200008  |
| H       | 1.0  | 9.77900028  | 5.54600000  | 7.81899977  |
| H       | 1.0  | 8.97900009  | 4.90999985  | 6.54799986  |
| O       | 8.0  | 7.43599987  | 8.75699997  | 4.73299980  |
| H       | 1.0  | 6.86399984  | 8.31700039  | 4.01700020  |
| H       | 1.0  | 8.13700008  | 9.25399971  | 4.19099998  |

**Atomic cartesian coordinates (Å) of the PBE/LnPPI GTH optimized structure of the  $[\text{Eu}^{3+}\text{-NA}\cdot(\text{H}_2\text{O})_4]^{3+}$  complex. Only the water molecules coordinated to  $\text{Eu}^{3+}$  included.**

| element | mass | x           | y           | z           |
|---------|------|-------------|-------------|-------------|
| Eu      | 63.0 | 7.74599981  | 7.30700016  | 6.86899996  |
| C       | 6.0  | 11.94299984 | 9.15699959  | 5.76700020  |
| C       | 6.0  | 13.42399979 | 8.83100033  | 5.49900007  |
| C       | 6.0  | 13.71700001 | 9.18299961  | 6.97200012  |
| C       | 6.0  | 10.81200027 | 8.21599960  | 5.36600018  |
| O       | 8.0  | 10.93700027 | 7.44000006  | 4.37599993  |
| O       | 8.0  | 9.79199982  | 8.31099987  | 6.13399982  |
| N       | 7.0  | 12.22200012 | 9.08100033  | 7.27799988  |
| H       | 1.0  | 11.68999958 | 10.19799995 | 5.52199984  |
| H       | 1.0  | 13.56000042 | 7.77299976  | 5.26399994  |
| H       | 1.0  | 13.92500019 | 9.44600010  | 4.74900007  |
| H       | 1.0  | 14.03299999 | 10.22000027 | 7.11800003  |
| H       | 1.0  | 14.31000042 | 8.50599957  | 7.59200001  |
| C       | 6.0  | 11.56700039 | 10.04100037 | 8.21700001  |
| C       | 6.0  | 11.68700027 | 9.60299969  | 9.68999958  |
| C       | 6.0  | 10.46000004 | 8.90799999  | 10.32499981 |
| N       | 7.0  | 9.26599979  | 9.80700016  | 10.21399975 |
| C       | 6.0  | 8.18099976  | 9.56499958  | 11.23400021 |
| C       | 6.0  | 6.90700006  | 10.33399963 | 10.85000038 |
| C       | 6.0  | 5.83300018  | 9.48299980  | 10.14700031 |
| N       | 7.0  | 4.75699997  | 10.39299965 | 9.63500023  |
| H       | 1.0  | 12.05900002 | 11.00800037 | 8.06900024  |
| H       | 1.0  | 10.53100014 | 10.13099957 | 7.87400007  |
| H       | 1.0  | 11.89200020 | 10.50100040 | 10.28499985 |
| H       | 1.0  | 12.56700039 | 8.95600033  | 9.82600021  |
| H       | 1.0  | 10.65799999 | 8.78800011  | 11.39700031 |
| C       | 6.0  | 10.17199993 | 7.51800013  | 9.73400021  |
| O       | 8.0  | 9.35999966  | 7.43499994  | 8.75100040  |
| O       | 8.0  | 10.84300041 | 6.56300020  | 10.22900009 |
| H       | 1.0  | 8.86200047  | 9.73299980  | 9.26399994  |
| H       | 1.0  | 8.02600002  | 8.47900009  | 11.31900024 |
| H       | 1.0  | 8.58100033  | 9.92399979  | 12.18900013 |
| H       | 1.0  | 6.46099997  | 10.76099968 | 11.75599957 |
| H       | 1.0  | 7.16499996  | 11.18500042 | 10.20600033 |
| H       | 1.0  | 5.36199999  | 8.80300045  | 10.86299992 |
| H       | 1.0  | 4.07399988  | 9.91499996  | 9.00100040  |
| C       | 6.0  | 6.42600012  | 8.65100002  | 9.01299953  |
| O       | 8.0  | 6.38700008  | 7.37300014  | 9.08500004  |
| O       | 8.0  | 6.99700022  | 9.26900005  | 8.05300045  |
| H       | 1.0  | 4.21000004  | 10.69900036 | 10.47900009 |
| H       | 1.0  | 5.14699984  | 11.20400047 | 9.07199955  |
| H       | 1.0  | 9.59399986  | 10.82100010 | 10.31799984 |
| H       | 1.0  | 12.03199959 | 8.08800030  | 7.55900002  |
| O       | 8.0  | 8.57499981  | 6.21000004  | 4.98299980  |
| H       | 1.0  | 9.42800045  | 6.52799988  | 4.57700014  |
| H       | 1.0  | 8.32699966  | 5.29500008  | 4.62900019  |
| O       | 8.0  | 5.69299984  | 6.48099995  | 6.12699986  |
| H       | 1.0  | 5.34600019  | 5.55100012  | 6.06699991  |
| H       | 1.0  | 5.13399982  | 6.98099995  | 5.44799995  |
| O       | 8.0  | 7.95699978  | 4.90899992  | 7.60900021  |
| H       | 1.0  | 8.63899994  | 4.66499996  | 8.29699993  |
| H       | 1.0  | 7.11800003  | 4.40500021  | 7.82600021  |
| O       | 8.0  | 7.08699989  | 8.92300034  | 5.24599981  |
| H       | 1.0  | 6.59700012  | 9.79100037  | 5.35900021  |
| H       | 1.0  | 7.30100012  | 8.81799984  | 4.27799988  |

**Atomic cartesian coordinates (Å) of the PBE/LnPP1 GTH optimized structure of the [Eu<sup>3+</sup>-NA·(H<sub>2</sub>O)<sub>5</sub>]<sup>3+</sup> complex. Only the water molecules coordinated to Eu<sup>3+</sup> included.**

| element | mass | x           | y           | z           |
|---------|------|-------------|-------------|-------------|
| Eu      | 63.0 | 7.83129978  | 7.52320004  | 6.34560013  |
| C       | 6.0  | 11.88360023 | 9.41580009  | 5.63219976  |
| C       | 6.0  | 13.38370037 | 9.16790009  | 5.38539982  |
| C       | 6.0  | 13.55720043 | 8.98709965  | 6.90950012  |
| C       | 6.0  | 10.75479984 | 8.66749954  | 4.92409992  |
| O       | 8.0  | 10.85369968 | 8.22949982  | 3.76410007  |
| O       | 8.0  | 9.70930004  | 8.57579994  | 5.68450022  |
| N       | 7.0  | 12.03409958 | 8.92609978  | 7.07900000  |
| H       | 1.0  | 11.62430000 | 10.48309994 | 5.66860008  |
| H       | 1.0  | 13.58530045 | 8.26679993  | 4.80350018  |
| H       | 1.0  | 13.92459965 | 10.01200008 | 4.95209980  |
| H       | 1.0  | 13.94999981 | 9.86660004  | 7.43219995  |
| H       | 1.0  | 14.03649998 | 8.07260036  | 7.27159977  |
| C       | 6.0  | 11.37849998 | 9.73139954  | 8.15019989  |
| C       | 6.0  | 11.48130035 | 9.10359955  | 9.54290009  |
| C       | 6.0  | 10.27200031 | 8.32229996  | 10.07789993 |
| N       | 7.0  | 8.99740028  | 9.12030029  | 10.12749958 |
| C       | 6.0  | 8.00010014  | 8.42249966  | 11.01169968 |
| C       | 6.0  | 6.65189981  | 9.11250019  | 11.14379978 |
| C       | 6.0  | 5.71350002  | 9.07540035  | 9.92329979  |
| N       | 7.0  | 4.37939978  | 9.54959965  | 10.41030025 |
| H       | 1.0  | 11.86870003 | 10.71370029 | 8.13059998  |
| H       | 1.0  | 10.34399986 | 9.86940002  | 7.82429981  |
| H       | 1.0  | 11.71350002 | 9.91549969  | 10.24940014 |
| H       | 1.0  | 12.34379959 | 8.41860008  | 9.59379959  |
| H       | 1.0  | 10.49670029 | 8.05519962  | 11.11579990 |
| C       | 6.0  | 9.96150017  | 7.02689981  | 9.30249977  |
| O       | 8.0  | 9.27789974  | 7.17490005  | 8.23180008  |
| O       | 8.0  | 10.40450001 | 5.94999981  | 9.79100037  |
| H       | 1.0  | 8.62619972  | 9.19880009  | 9.15789986  |
| H       | 1.0  | 7.88420010  | 7.39510012  | 10.64439964 |
| H       | 1.0  | 8.45820045  | 8.36639977  | 12.00580025 |
| H       | 1.0  | 6.15990019  | 8.57670021  | 11.96899986 |
| H       | 1.0  | 6.77370024  | 10.15419960 | 11.46450043 |
| H       | 1.0  | 6.02909994  | 9.78349972  | 9.15079975  |
| H       | 1.0  | 3.59069991  | 9.47159958  | 9.70699978  |
| C       | 6.0  | 5.63969994  | 7.66340017  | 9.30749989  |
| O       | 8.0  | 4.89750004  | 6.82110023  | 9.88749981  |
| O       | 8.0  | 6.39260006  | 7.44089985  | 8.30230045  |
| H       | 1.0  | 4.44159985  | 10.56569958 | 10.67230034 |
| H       | 1.0  | 4.07040024  | 9.07339954  | 11.28299999 |
| H       | 1.0  | 9.08990002  | 10.13379955 | 10.48400021 |
| H       | 1.0  | 11.74800014 | 7.92269993  | 7.08220005  |
| O       | 8.0  | 8.47669983  | 6.74340010  | 3.94989991  |
| H       | 1.0  | 9.43630028  | 6.91219997  | 3.78259993  |
| H       | 1.0  | 8.34189987  | 5.77360010  | 3.83759999  |
| O       | 8.0  | 6.12809992  | 6.03749990  | 5.60330009  |
| H       | 1.0  | 6.18370008  | 5.03889990  | 5.66830015  |
| H       | 1.0  | 5.15630007  | 6.23899984  | 5.72760010  |
| O       | 8.0  | 7.95650005  | 9.88059998  | 7.35349989  |
| H       | 1.0  | 7.20930004  | 10.48060036 | 7.60589981  |
| H       | 1.0  | 8.51340008  | 10.46339989 | 6.74609995  |
| O       | 8.0  | 9.18299961  | 5.26090002  | 6.29589987  |
| H       | 1.0  | 9.29119968  | 4.67880011  | 7.09399986  |
| H       | 1.0  | 8.95069981  | 4.65560007  | 5.53200006  |
| O       | 8.0  | 6.38229990  | 8.83510017  | 5.06879997  |
| H       | 1.0  | 6.16870022  | 9.81770039  | 5.10239983  |
| H       | 1.0  | 5.79600000  | 8.45740032  | 4.35410023  |

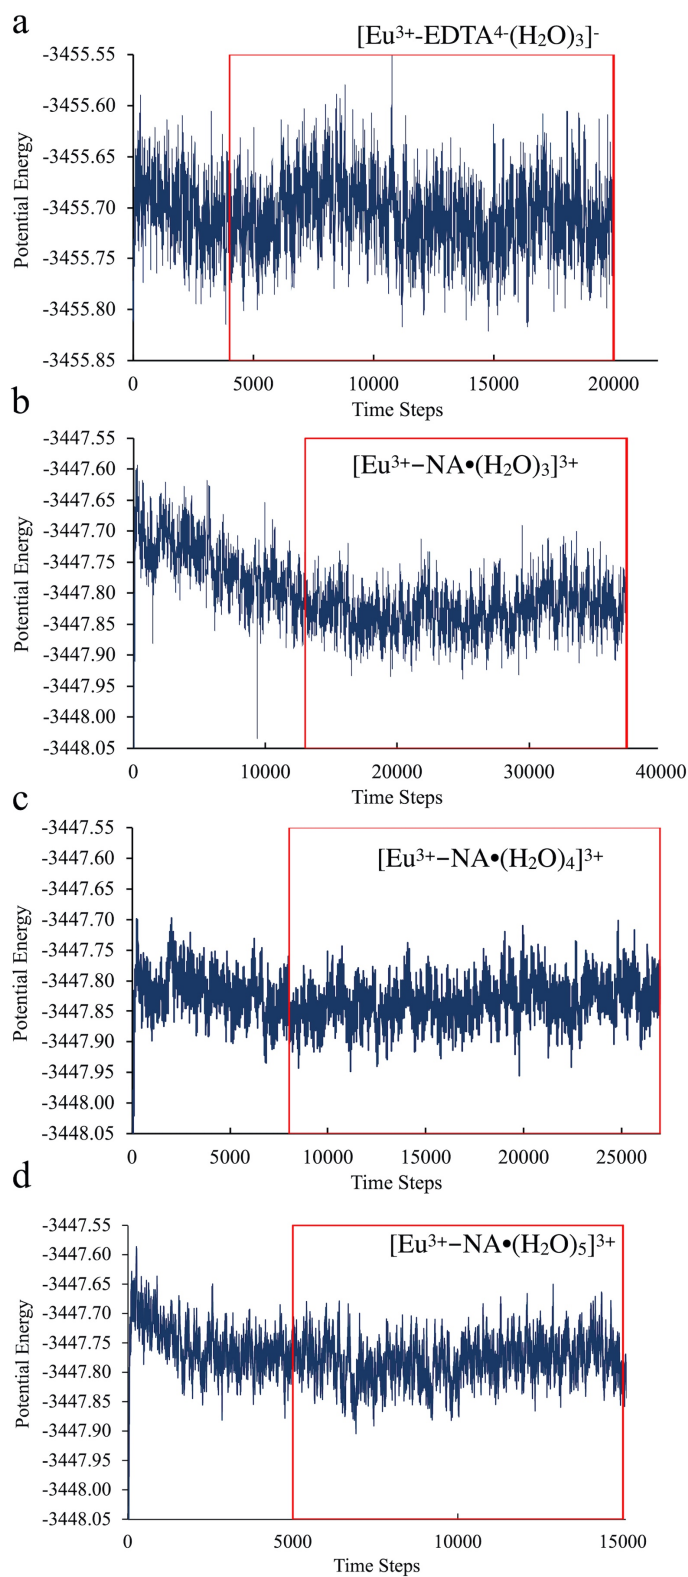

**Figure S1.** Potential energy (hartree) plots for AIMD trajectories of simulated complexes. a)  $[\text{Eu}^{3+}\text{-EDTA}^{4-}(\text{H}_2\text{O})_3]^-$  complex, b)  $[\text{Eu}^{3+}\text{-NA}\cdot(\text{H}_2\text{O})_3]^{3+}$  complex, c)  $[\text{Eu}^{3+}\text{-NA}\cdot(\text{H}_2\text{O})_4]^{3+}$ , d)  $[\text{Eu}^{3+}\text{-NA}\cdot(\text{H}_2\text{O})_5]^{3+}$  complex. Red boxes indicate the equilibrated portions of AIMD trajectories that were used to obtain the radial distribution functions and further analysis.

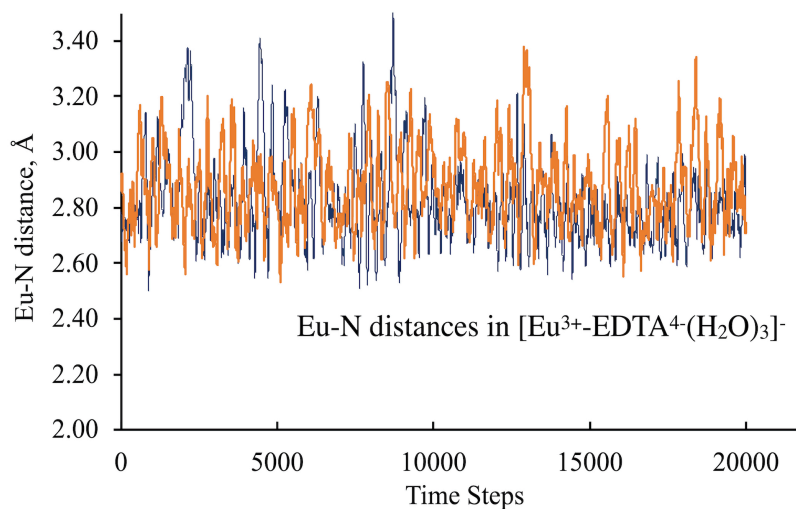

**Figure S2.** Plot of Eu-N bond distances during the AIMD trajectory of the  $[\text{Eu}^{3+}\text{-EDTA}^{4-}\cdot(\text{H}_2\text{O})_3]^-$  complex. Orange and blue curves represent the Eu-N distances for two individual nitrogen atoms along the AIMD trajectory.

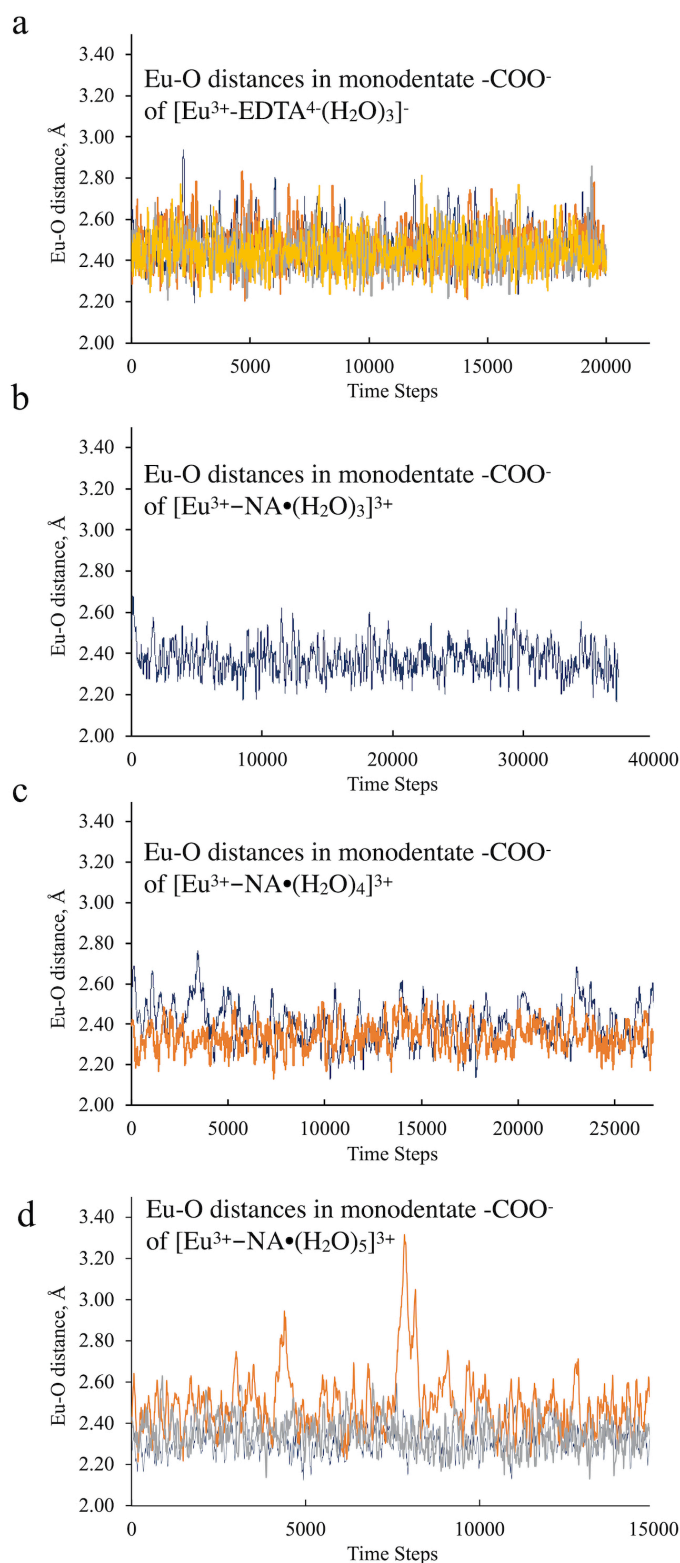

**Figure S3.** Plots of Eu-O bond distances, for monodentate carboxylates, during the AIMD trajectories of a)  $[\text{Eu}^{3+}\text{-EDTA}^{4-}\cdot(\text{H}_2\text{O})_3]^-$  complex, b)  $[\text{Eu}^{3+}\text{-NA}\cdot(\text{H}_2\text{O})_3]^{3+}$  complex, c)  $[\text{Eu}^{3+}\text{-NA}\cdot(\text{H}_2\text{O})_4]^{3+}$  complex, d)  $[\text{Eu}^{3+}\text{-NA}\cdot(\text{H}_2\text{O})_5]^{3+}$  complex. Orange, blue, yellow and grey curves represent the Eu-O distances for individual oxygen atoms along the AIMD trajectory.



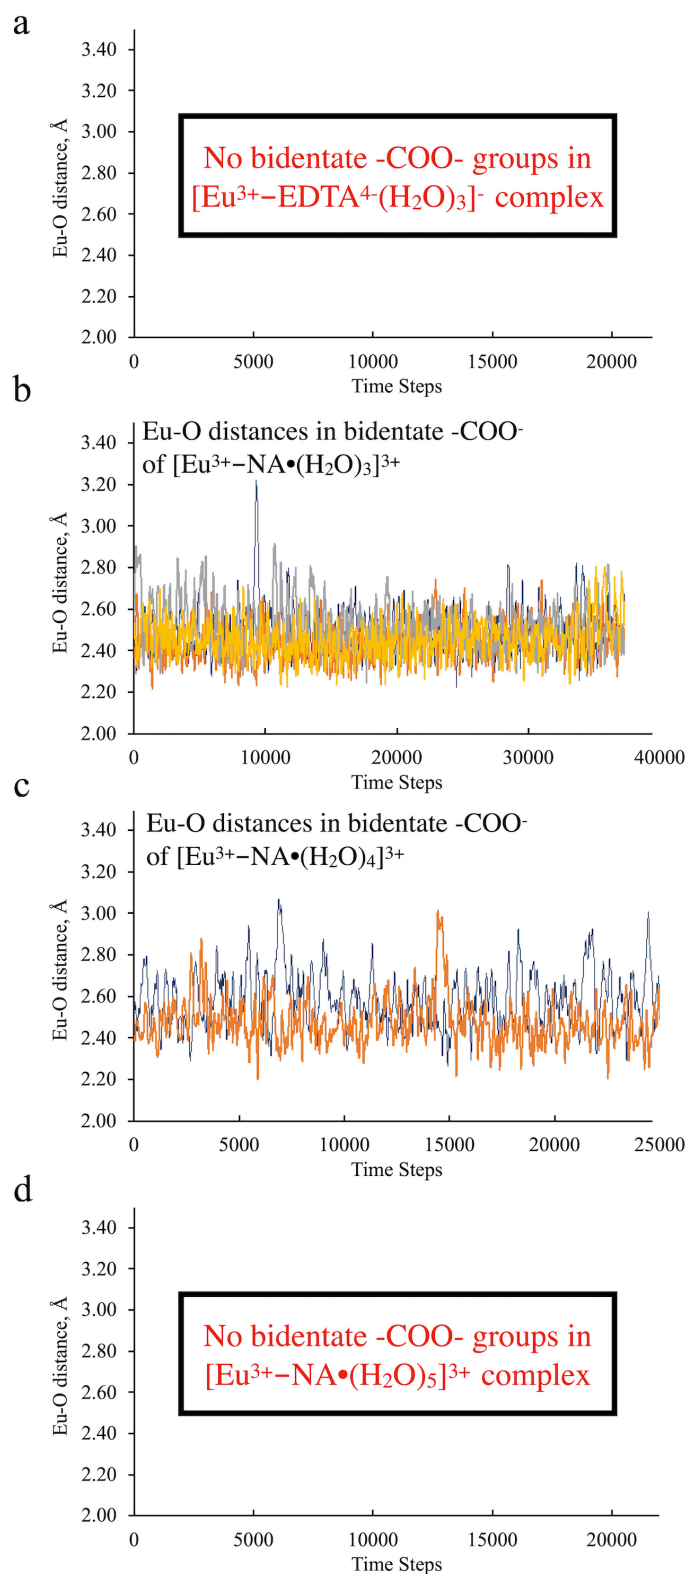

**Figure S4.** Plots of Eu-O bond distances, for bi-dentate carboxylates, during the AIMD trajectories of b)  $[\text{Eu}^{3+}-\text{NA}\cdot(\text{H}_2\text{O})_3]^{3+}$  complex, c)  $[\text{Eu}^{3+}-\text{NA}\cdot(\text{H}_2\text{O})_4]^{3+}$  complex, d)  $[\text{Eu}^{3+}-\text{NA}\cdot(\text{H}_2\text{O})_5]^{3+}$  complex. Orange, blue, yellow and grey curves represent the Eu-O distances for individual oxygen atoms along the AIMD trajectory.

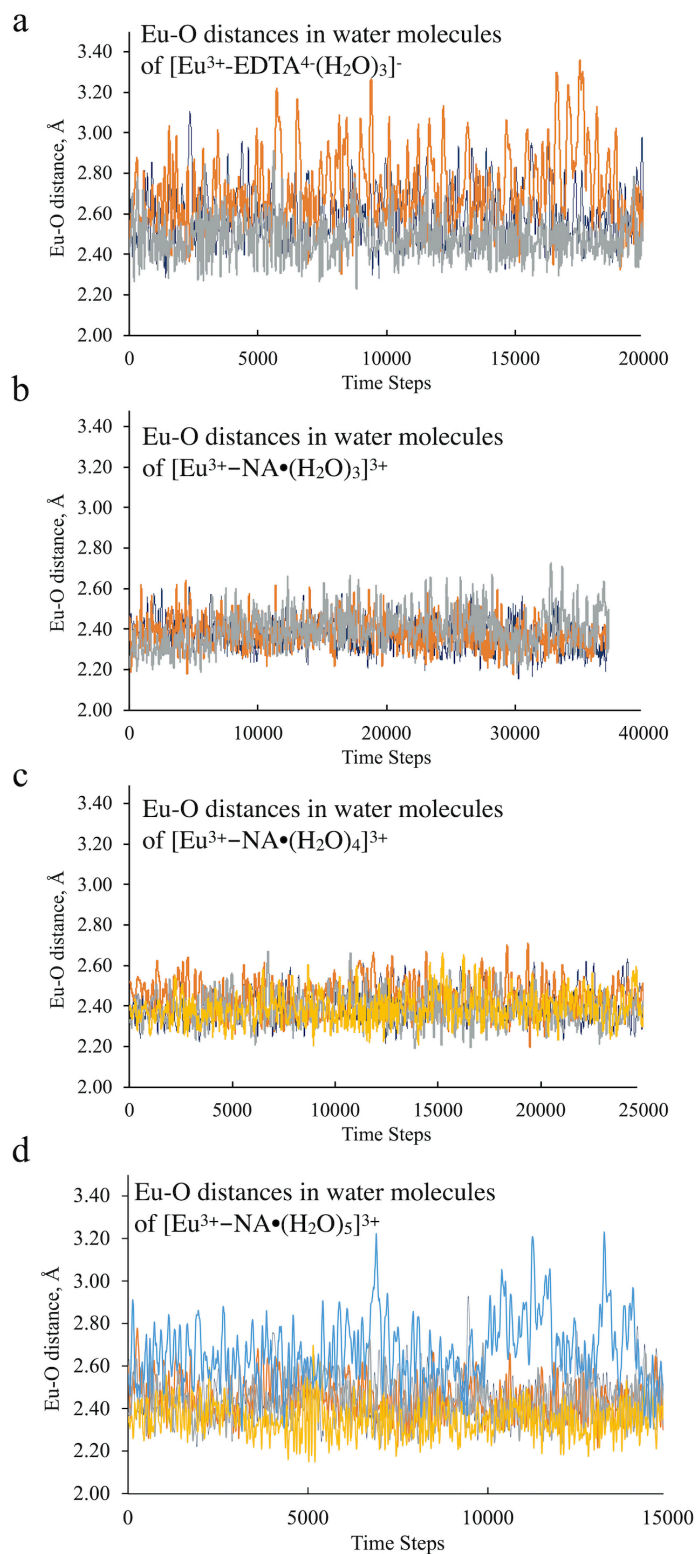

**Figure S5.** Plots of Eu-O bond distances, for water molecules, during the AIMD trajectories of a)  $[\text{Eu}^{3+}\text{-EDTA}^{4-}(\text{H}_2\text{O})_3]^{-}$  complex, b)  $[\text{Eu}^{3+}\text{-NA}\cdot(\text{H}_2\text{O})_3]^{3+}$  complex, c)  $[\text{Eu}^{3+}\text{-NA}\cdot(\text{H}_2\text{O})_4]^{3+}$  complex, d)  $[\text{Eu}^{3+}\text{-NA}\cdot(\text{H}_2\text{O})_5]^{3+}$ . Orange, blue, yellow and grey curves represent the Eu-O distances for individual oxygen atoms along the AIMD trajectory.

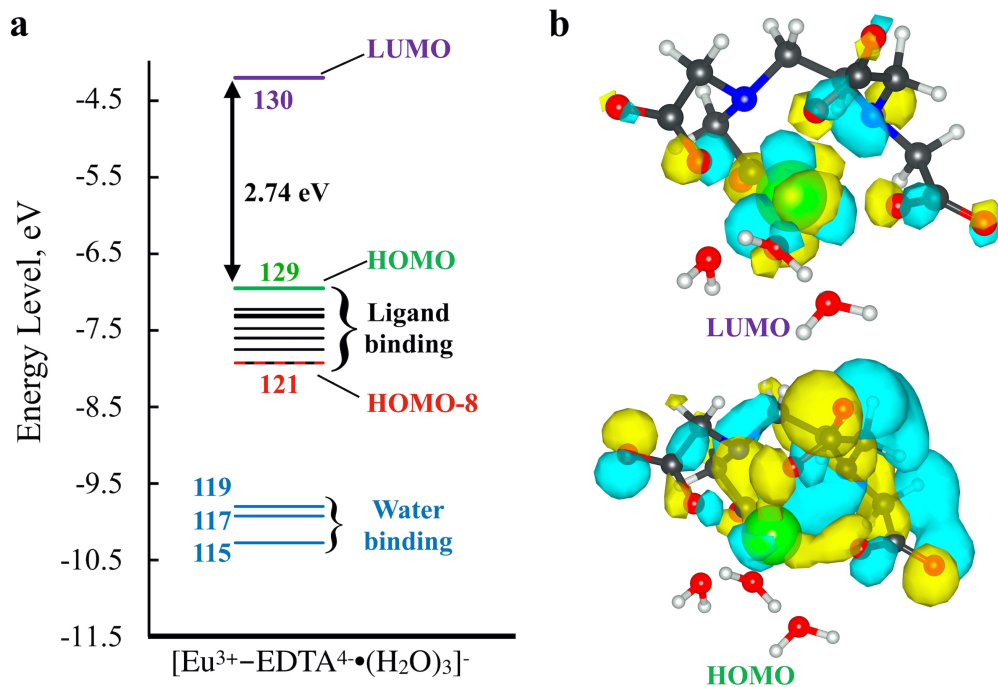

**Figure S6.** Valence molecular orbitales (MOs) of the  $[\text{Eu}^{3+}\text{-EDTA}^{4-}\cdot(\text{H}_2\text{O})_3]^-$  complex. a) MO diagrams. b) HOMO and LUMO orbitals, the orbital wave functions are positive in the yellow regions and negative in the cyan.

**Table S1:** Binding energies

| Complex                                                            | Binding Energies (kJ/mol) | Relative Binding Energies |
|--------------------------------------------------------------------|---------------------------|---------------------------|
| $[\text{Eu}^{3+}\text{-NA}\cdot(\text{H}_2\text{O})_3]^{3+}$       | -1025                     | 0.78                      |
| $[\text{Eu}^{3+}\text{-NA}\cdot(\text{H}_2\text{O})_4]^{3+}$       | -1068                     | 0.81                      |
| $[\text{Eu}^{3+}\text{-NA}\cdot(\text{H}_2\text{O})_5]^{3+}$       | -1059                     | 0.80                      |
| $[\text{Eu}^{3+}\text{-EDTA}^{4-}\cdot(\text{H}_2\text{O})_3]^{-}$ | -1322                     | 1.00                      |
